# Supplementary material
Source: publisher site journal article supplement (https://www.dovepress.com/article/236964)
Supplement: Supplementary file 1 [file get_supplementary_file.php]

## **Electronic Supplementary Material**

### **Patient Preference and Adherence**

#### **Methods to assess patient preferences in old age pharmacotherapy – a systematic review**

Annette Eidam<sup>1</sup>, Anja Roth<sup>1</sup>, André Lacroix<sup>1</sup>, Sabine Goisser<sup>1,2</sup>, Hanna M. Seidling<sup>3,4</sup>, Walter E. Haefeli<sup>3,4</sup>, Jürgen M. Bauer<sup>1,2</sup>

<sup>1</sup>Center of Geriatric Medicine, Heidelberg University, AGAPLESION Bethanien Hospital Heidelberg, Rohrbacher Straße 149, 69126 Heidelberg, Germany

<sup>2</sup>Network Aging Research (NAR), Heidelberg University, Bergheimer Straße 20, 69115 Heidelberg, Germany

<sup>3</sup>Department of Clinical Pharmacology and Pharmacoepidemiology, Heidelberg University, Im Neuenheimer Feld 410, 69120 Heidelberg, Germany

<sup>4</sup>Cooperation Unit Clinical Pharmacy, Heidelberg University, Im Neuenheimer Feld 410, 69120 Heidelberg, Germany

#### **Correspondence:**

Dr. med. Annette Eidam

Center of Geriatric Medicine, Heidelberg University, AGAPLESION Bethanien Hospital Heidelberg, Rohrbacher Straße 149, 69126 Heidelberg, Germany

Tel: +49 (0) 6221-319-1795

Fax: +49 (0) 6221-319-1505

Email: Annette.Eidam@bethanien-heidelberg.de

**Table S1** Search string (PubMed)

|                                                                                                                                                                                                                                                                                                                                                                                                                                                                                                                       |
|-----------------------------------------------------------------------------------------------------------------------------------------------------------------------------------------------------------------------------------------------------------------------------------------------------------------------------------------------------------------------------------------------------------------------------------------------------------------------------------------------------------------------|
| Elderly [tiab] OR community-dwelling [tiab] OR geriatric [tiab] OR “mini-mental state” [tiab] OR mmse [tiab] OR caregivers [tiab] OR falls [tiab] OR Adl [tiab] OR Frailty [tiab] OR Gds [tiab] OR Ageing [tiab] OR elders [tiab] OR Frail [tiab] OR Mci [tiab] OR “cognitive impairment” [tiab] OR “postmenopausal women” [tiab] OR Comorbidities [tiab] OR geriatric assessment [mh] OR Nursing homes [mh] OR frail elderly [mh] OR homes for the aged [mh] OR older [tiab] OR age-related [tiab] OR senior* [tiab] |
| AND                                                                                                                                                                                                                                                                                                                                                                                                                                                                                                                   |
| (patient preference [mh] OR preference* [tiab] OR health outcome priorit* [tiab] OR priorit* [ti])                                                                                                                                                                                                                                                                                                                                                                                                                    |
| AND                                                                                                                                                                                                                                                                                                                                                                                                                                                                                                                   |
| (drug therapy [MeSH] OR medication [tiab] OR treatment [tiab] OR health state* [tiab] OR therap* [tiab] OR health outcome* [tiab])                                                                                                                                                                                                                                                                                                                                                                                    |

**Table S2** Assessment evaluating the methodological quality of the included studies<sup>a</sup>

| Question                                                                                  | Criteria for evaluation                                                                                                                                                                                                                                                                                                                                 | Scoring   |
|-------------------------------------------------------------------------------------------|---------------------------------------------------------------------------------------------------------------------------------------------------------------------------------------------------------------------------------------------------------------------------------------------------------------------------------------------------------|-----------|
| 1. Was a well-defined question in relation to preferences posed in an answerable form?    | There is a well-defined research question in relation to preferences, considering key components of the PICOT format (population, intervention, comparator, outcome, timing, and setting).                                                                                                                                                              | Yes<br>No |
| 2. Are the characteristics of the participants included in the study clearly described?   | Inclusion and/or exclusion criteria for participation in the preference study are transparently reported.                                                                                                                                                                                                                                               | Yes<br>No |
| 2a. Are data in relation to the cognitive status of the participants reported?            | The cognitive status of the participants is detailed by reporting the results of a standardized cognitive assessment of the study population OR by reporting the prevalence of medical conditions such as “dementia” or “cognitive impairment” in the study population.                                                                                 | Yes<br>No |
| 2b. Are data in relation to the affective status of the participants reported?            | The affective status of the participants is detailed by reporting the results of a standardized mental assessment of the study population OR by reporting the prevalence of a medical condition such as “depression” or “depressive episode” in the study population.                                                                                   | Yes<br>No |
| 3. Are the methods of assessing preferences clearly explained?                            | The actual preference instrument (including questions and response options) is reported in the text or an appendix or referenced and available elsewhere OR the description of the instrument in the article is detailed enough to understand what kind of material and questions were presented to the participants and what responses were available. | Yes<br>No |
| 4. Are information in relation to the test quality of the preference instrument reported? | Reports information in relation to the test quality (validity, reliability, and comprehensibility) of the respective preference instrument (this includes references to previous studies examining the test quality of the instrument).                                                                                                                 | Yes<br>No |

**Notes:** <sup>a</sup> Questions adapted from:

1. Joy SM, Little E, Maruthur NM, Purnell TS, Bridges JF. Patient preferences for the treatment of type 2 diabetes: a scoping review. *Pharmacoeconomics*. 2013;31(10):877-892.
2. Purnell TS, Joy S, Little E, Bridges JF, Maruthur N. Patient preferences for noninsulin diabetes medications: a systematic review. *Diabetes Care*. 2014;37(7):2055-2062.

**Table S3** Methodological quality of the included studies

| Study                               | 1. Study question well-defined | 2. Inclusion criteria well-described | 2a. Cognitive status reported | 2b. Affective status reported | 3. Method well explained | 4. Test quality reported |
|-------------------------------------|--------------------------------|--------------------------------------|-------------------------------|-------------------------------|--------------------------|--------------------------|
| Akishita et al. 2013 <sup>62</sup>  | Yes                            | Yes                                  | No                            | No                            | Yes                      | Yes                      |
| Baxter et al. 2016 <sup>79</sup>    | Yes                            | Yes                                  | No                            | No                            | Yes                      | Yes                      |
| Böttger et al. 2015 <sup>80</sup>   | Yes                            | Yes                                  | Yes                           | Yes                           | Yes                      | Yes                      |
| Bowling et al. 2008 <sup>34</sup>   | Yes                            | No                                   | No                            | No                            | Yes                      | Yes                      |
| Brown et al. 2008 <sup>35</sup>     | Yes                            | Yes                                  | Yes                           | Yes                           | Yes                      | No                       |
| Carpenter et al. 2007 <sup>36</sup> | Yes                            | Yes                                  | Yes                           | Yes                           | No                       | Yes                      |
| Case et al. 2013a <sup>58</sup>     | Yes                            | Yes                                  | Yes                           | Yes                           | Yes                      | Yes                      |
| Case et al. 2013b <sup>59</sup>     | Yes                            | Yes                                  | Yes                           | Yes                           | Yes (all tools)          | Yes (all tools)          |
| Case et al. 2014 <sup>60</sup>      | Yes                            | Yes                                  | Yes                           | No                            | Yes (all tools)          | Yes (all tools)          |
| Caughey et al. 2017 <sup>63</sup>   | Yes                            | Yes                                  | Yes                           | No                            | Yes                      | Yes                      |
| Cherniack et al. 2008 <sup>37</sup> | Yes                            | Yes                                  | No                            | No                            | Yes                      | No                       |
| Chin et al. 2008 <sup>38</sup>      | Yes                            | No                                   | No                            | Yes                           | Yes                      | No                       |
| Cline & Mott 2003 <sup>39</sup>     | No                             | Yes                                  | No                            | No                            | Yes                      | Yes                      |
| Cranney et al. 2001 <sup>40</sup>   | Yes                            | Yes                                  | No                            | Yes                           | Yes                      | Yes                      |
| Danner et al. 2016 <sup>81</sup>    | Yes                            | Yes                                  | No                            | No                            | Yes                      | Yes                      |
| de Vries et al. 2015 <sup>88</sup>  | Yes                            | Yes                                  | No                            | No                            | Yes                      | Yes                      |
| Decalf et al. 2017 <sup>64</sup>    | Yes                            | Yes                                  | Yes                           | Yes                           | Yes                      | Yes                      |
| Extermann et al. 2003 <sup>41</sup> | Yes                            | Yes                                  | Yes                           | Yes                           | Yes                      | No                       |
| Fraenkel et al. 2015 <sup>89</sup>  | Yes                            | Yes                                  | No                            | No                            | No                       | Yes                      |
| Fried et al. 2011a <sup>61</sup>    | Yes                            | Yes                                  | Yes                           | Yes                           | Yes                      | Yes                      |
| Fried et al. 2011b <sup>65</sup>    | Yes                            | Yes                                  | Yes                           | Yes                           | Yes                      | Yes                      |
| Fuller et al. 2004 <sup>42</sup>    | Yes                            | Yes                                  | Yes                           | No                            | Yes                      | Yes                      |
| Fyffe et al. 2008 <sup>43</sup>     | Yes                            | Yes                                  | Yes                           | Yes                           | Yes                      | Yes                      |
| Girones et al. 2012 <sup>66</sup>   | Yes                            | No                                   | Yes                           | Yes                           | No                       | Yes                      |
| Gum et al. 2010a <sup>82</sup>      | Yes                            | Yes                                  | No                            | Yes                           | Yes                      | Yes                      |
| Gum et al. 2010b <sup>83</sup>      | Yes                            | Yes                                  | Yes                           | Yes                           | Yes                      | Yes                      |
| Hamelinck et al. 2016 <sup>90</sup> | Yes                            | Yes                                  | Yes                           | Yes                           | Yes                      | Yes                      |

| Study                                      | 1. Study question well-defined | 2. Inclusion criteria well-described | 2a. Cognitive status reported | 2b. Affective status reported | 3. Method well explained | 4. Test quality reported |
|--------------------------------------------|--------------------------------|--------------------------------------|-------------------------------|-------------------------------|--------------------------|--------------------------|
| Holbrook et al. 2007 <sup>44</sup>         | Yes                            | Yes                                  | Yes                           | No                            | Yes                      | Yes                      |
| Jimenez et al. 2012 <sup>67</sup>          | Yes                            | Yes                                  | Yes                           | Yes                           | Yes                      | No                       |
| Junius-Walker et al. 2011 <sup>68</sup>    | Yes                            | Yes                                  | Yes                           | Yes                           | Yes                      | Yes                      |
| Junius-Walker et al. 2012 <sup>69</sup>    | Yes                            | Yes                                  | Yes                           | Yes                           | Yes                      | Yes                      |
| Junius-Walker et al. 2015 <sup>70</sup>    | Yes                            | Yes                                  | Yes                           | Yes                           | Yes                      | Yes                      |
| König et al. 2014 <sup>84</sup>            | Yes                            | Yes                                  | Yes                           | No                            | Yes                      | Yes                      |
| Landreville et al. 2001 <sup>45</sup>      | Yes                            | Yes                                  | No                            | Yes                           | Yes                      | Yes                      |
| Luck-Sikorski et al. 2017 <sup>71</sup>    | Yes                            | Yes                                  | Yes                           | Yes                           | Yes                      | No                       |
| Mandelblatt et al. 2010 <sup>72</sup>      | Yes                            | Yes                                  | Yes                           | No                            | Yes                      | Yes                      |
| Man-Son-Hing et al. 2000 <sup>46</sup>     | Yes                            | Yes                                  | No                            | No                            | Yes (both tools)         | Yes (both tools)         |
| Miller et al. 1998 <sup>31</sup>           | Yes                            | Yes                                  | Yes                           | No                            | Yes                      | No                       |
| Mohlman 2012 <sup>73</sup>                 | Yes                            | No                                   | No                            | Yes                           | Yes                      | Yes                      |
| Mueller et al. 2016 <sup>85</sup>          | Yes                            | Yes                                  | No                            | No                            | Yes                      | Yes                      |
| Murphy et al. 2002 <sup>47</sup>           | Yes                            | Yes                                  | Yes                           | Yes                           | Yes                      | Yes                      |
| Muth et al. 2016 <sup>53</sup>             | No                             | Yes                                  | Yes                           | Yes                           | Yes                      | No                       |
| Nyman et al. 2005 <sup>48</sup>            | Yes                            | Yes                                  | No                            | No                            | No                       | Yes                      |
| Perret-Guillaume et al. 2011 <sup>74</sup> | Yes                            | Yes                                  | Yes                           | Yes                           | Yes                      | Yes                      |
| Pfisterer et al. 2007 <sup>49</sup>        | Yes                            | Yes                                  | Yes                           | No                            | Yes                      | Yes                      |
| Protheroe et al. 2000 <sup>50</sup>        | Yes                            | Yes                                  | No                            | No                            | Yes                      | No                       |
| Raue et al. 2011 <sup>75</sup>             | Yes                            | Yes                                  | Yes                           | Yes                           | Yes                      | Yes                      |
| Rochon et al. 2014 <sup>76</sup>           | Yes                            | Yes                                  | No                            | No                            | Yes                      | Yes                      |
| Schnabel et al. 2014 <sup>54</sup>         | No                             | Yes                                  | No                            | No                            | Yes                      | No                       |
| Schonberg et al. 2014 <sup>55</sup>        | No                             | Yes                                  | Yes                           | No                            | Yes                      | No                       |
| Silverman et al. 2013 <sup>77</sup>        | Yes                            | Yes                                  | No                            | Yes                           | Yes (both tools)         | Yes (both tools)         |
| Sudlow et al. 1998 <sup>32</sup>           | Yes                            | Yes                                  | Yes                           | No                            | Yes                      | No                       |
| Tinetti et al. 2008a <sup>51</sup>         | Yes                            | Yes                                  | Yes                           | No                            | Yes                      | Yes                      |
| Tinetti et al. 2008b <sup>52</sup>         | Yes                            | Yes                                  | Yes                           | Yes                           | Yes                      | Yes                      |
| Uemura et al. 2016 <sup>86</sup>           | Yes                            | Yes                                  | No                            | No                            | Yes                      | Yes                      |

| <b>Study</b>                           | <b>1. Study question well-defined</b> | <b>2. Inclusion criteria well-described</b> | <b>2a. Cognitive status reported</b> | <b>2b. Affective status reported</b> | <b>3. Method well explained</b> | <b>4. Test quality reported</b> |
|----------------------------------------|---------------------------------------|---------------------------------------------|--------------------------------------|--------------------------------------|---------------------------------|---------------------------------|
| van Summeren et al. 2016 <sup>57</sup> | Yes                                   | Yes                                         | Yes                                  | No                                   | Yes                             | Yes                             |
| van Summeren et al. 2017 <sup>56</sup> | Yes                                   | Yes                                         | Yes                                  | No                                   | Yes                             | Yes                             |
| Vennedey et al. 2016 <sup>87</sup>     | Yes                                   | Yes                                         | No                                   | No                                   | Yes                             | Yes                             |
| Voigt et al. 2010 <sup>78</sup>        | Yes                                   | Yes                                         | Yes                                  | Yes                                  | Yes                             | Yes                             |
| Yellen et al. 1994 <sup>33</sup>       | Yes                                   | No                                          | No                                   | No                                   | Yes                             | No                              |
